# Supplementary material for: Afadin-deficient mouse retinas exhibit severe neuronal lamination defects but preserve visual functions
Source: eLife journal article supplement (doi:10.7554/elife.105627), 2025-02-14
Supplement: fig2-figsupp1-data1 [file Figure 2-figure supplement 2, Source Data 1 .pdf › Figure 2-figure supplement 2, Source Data 1 .pdf]

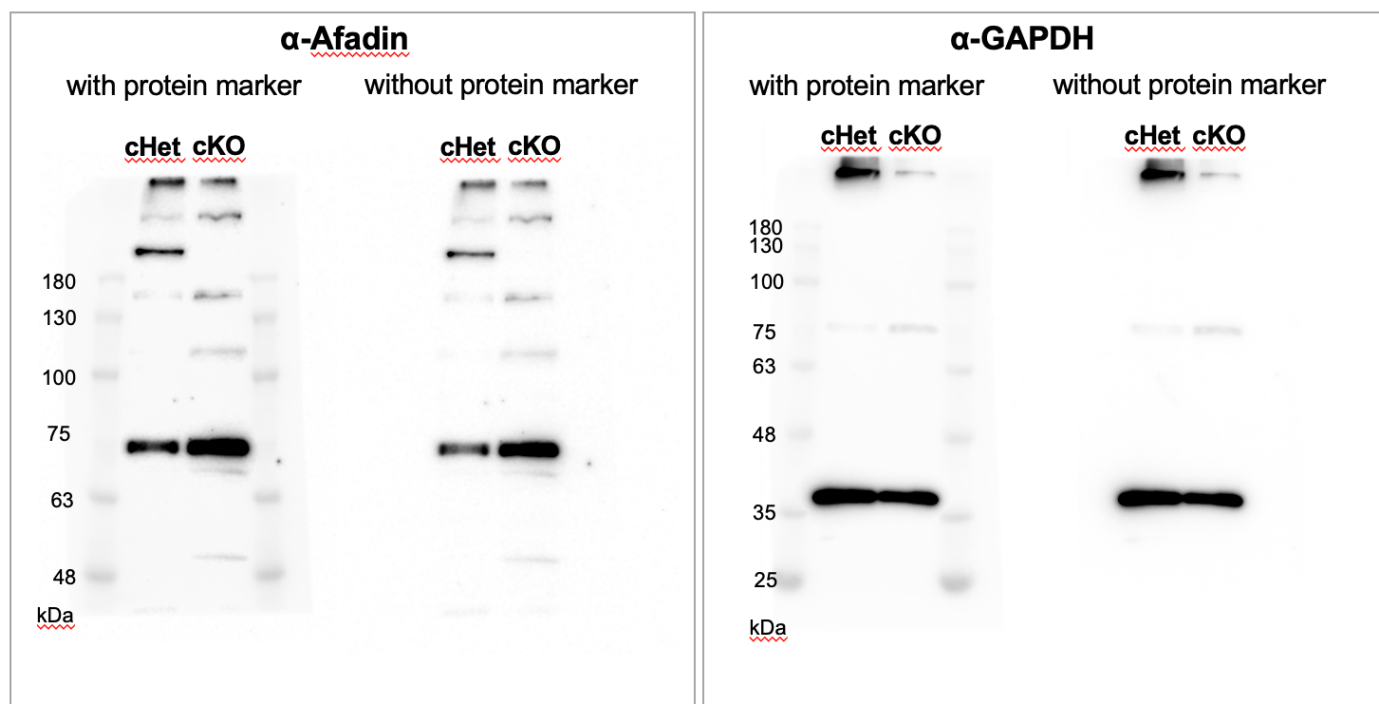

**Figure 2-figure supplement 2-Source Data 1.** Original membranes corresponding to Figure 2-figure supplement 1C. BlueStar Prestained Protein Marker (#NE-MWP03) were employed. The images of the protein marker and chemiluminescent signal were merged in each left panel.
